# Supplementary material for: One pot synthesis of magnetite–silica nanocomposites: applications as tags, entrapment matrix and in water purification
Source: Royal Society of Chemistry journal article supplement (doi:10.1039/c2ta00951j), 2012-12-03
Supplement: c2ta00951j.pdf [file c2ta00951j.pdf]

### Supplementary information

#### Nanoparticle Calculations:

A combination of DLS particle size distribution, EDAX and certain basic assumption was used to determine the number of magnetite particles per gram of the powder for bare magnetite and magnetite-silica composite.

The magnetite unit cell parameters are:  $a=b=c=8.39 \text{ \AA}$ , which translates to a unit cell volume of  $590.5 \text{ \AA}^3$  i.e.  $590.5 \times 10^{-24} \text{ cm}^3$ . There are 8  $\text{Fe}_3\text{O}_4$  units per unit cell, which gives a volume of  $73.8 \times 10^{-24} \text{ cm}^3$  per  $\text{Fe}_3\text{O}_4$  unit. Total number of Fe & O atoms per unit cell is 24 and 32 respectively. The weight of one unit cell can be calculated from the weight of individual Fe atoms ( $55.84/6.02 \times 10^{23} = 9.275 \times 10^{-23} \text{ g}$ ) and O atoms ( $16/6.02 \times 10^{23} = 2.657 \times 10^{-23} \text{ g}$ ) to be  $307.6 \times 10^{-23} \text{ g}$ . The table below gives the detailed calculations:

| Size in nm | Number in % | Volume of the particles ( $4/3\pi r^3$ ) in $\text{cm}^3$ | No. of unit cell/particle | Tot no of unit cells | Number of Fe atom/particle | Total No. of Fe atoms | weight of single particle in g | Total weight of particles in g |
|------------|-------------|-----------------------------------------------------------|---------------------------|----------------------|----------------------------|-----------------------|--------------------------------|--------------------------------|
| 24         | 9           | $7.234 \times 10^{-18}$                                   | 12261                     | 110349               | 294264                     | 2648376               | $37.721 \times 10^{-18}$       | $335.439 \times 10^{-18}$      |
| 28         | 27          | $11.488 \times 10^{-18}$                                  | 19471                     | 525717               | 467304                     | 12617208              | $59.897 \times 10^{-18}$       | $1616.139 \times 10^{-18}$     |
| 33         | 32          | $18.806 \times 10^{-18}$                                  | 31875                     | 1020000              | 765000                     | 24480000              | $98.055 \times 10^{-18}$       | $3137.760 \times 10^{-18}$     |
| 38         | 21          | $28.715 \times 10^{-18}$                                  | 48669                     | 1022049              | 1168056                    | 24529176              | $149.717 \times 10^{-18}$      | $3144.057 \times 10^{-18}$     |
| 44         | 9           | $44.578 \times 10^{-18}$                                  | 75557                     | 680013               | 1813368                    | 16320312              | $232.444 \times 10^{-18}$      | $2091.996 \times 10^{-18}$     |
| 51         | 2           | $69.419 \times 10^{-18}$                                  | 117660                    | 235320               | 2823840                    | 5647680               | $361.969 \times 10^{-18}$      | $723.939 \times 10^{-18}$      |
|            | 100         |                                                           | 305493                    | 3593448              | 7331832                    | 86242752              |                                | $11049.330 \times 10^{-18}$    |

From the above table, it is clear that for a set of 100 nanoparticles, total number of unit cells = 3593448.

Weight of one unit cell =  $307 \times 10^{-23} \text{ g}$ ; which gives the weight of all unit cells = weight of 100 nanoparticles to be  $11.05 \times 10^{-15} \text{ g}$ .

If the weight of 100 nanoparticles is known, one can estimate the number of nanoparticles per gram of the powder to be:  $9.04 \times 10^{15}$

To understand the amount of silica, we need to calculate in terms of Fe: Si ratio. Hence by simple calculations, we can estimate the number of Fe atoms per gram to be:

100 Nanoparticles correspond to 86242752 Fe atoms. Since we know the number of nanoparticles per gram, we can determine number of Fe atoms per gram of nanoparticles to be:  $77.96 \times 10^{20}$

By EDAX, (Figure S1), the Si : Fe ratio is 1:43. Hence for every 43 atoms of Fe, there is 1 Si atom (or SiO<sub>2</sub> unit). Hence for  $77.96 \times 10^{20}$  Fe atoms, this translates to  $1.81 \times 10^{20}$  units of SiO<sub>2</sub> per gram of nanoparticles.

Weight of SiO<sub>2</sub> unit ( $60.08/6.023 \times 10^{23}$ ) =  $9.97 \times 10^{-23}$  g.

Hence the total weight of all SiO<sub>2</sub> units per gram of nanoparticles is: 0.018 g.

Here we make an assumption that the size of magnetite is same in case of magnetite and magnetite-silica composite. This is not far from true if one takes in to account the average DLS sizes for magnetite (~ 37 nm) and magnetite silica composite (~46 nm); with the TEM size in the range of 29 nm. Taking this into consideration, the magnetite-silica composite contains 1.8 % of silica.

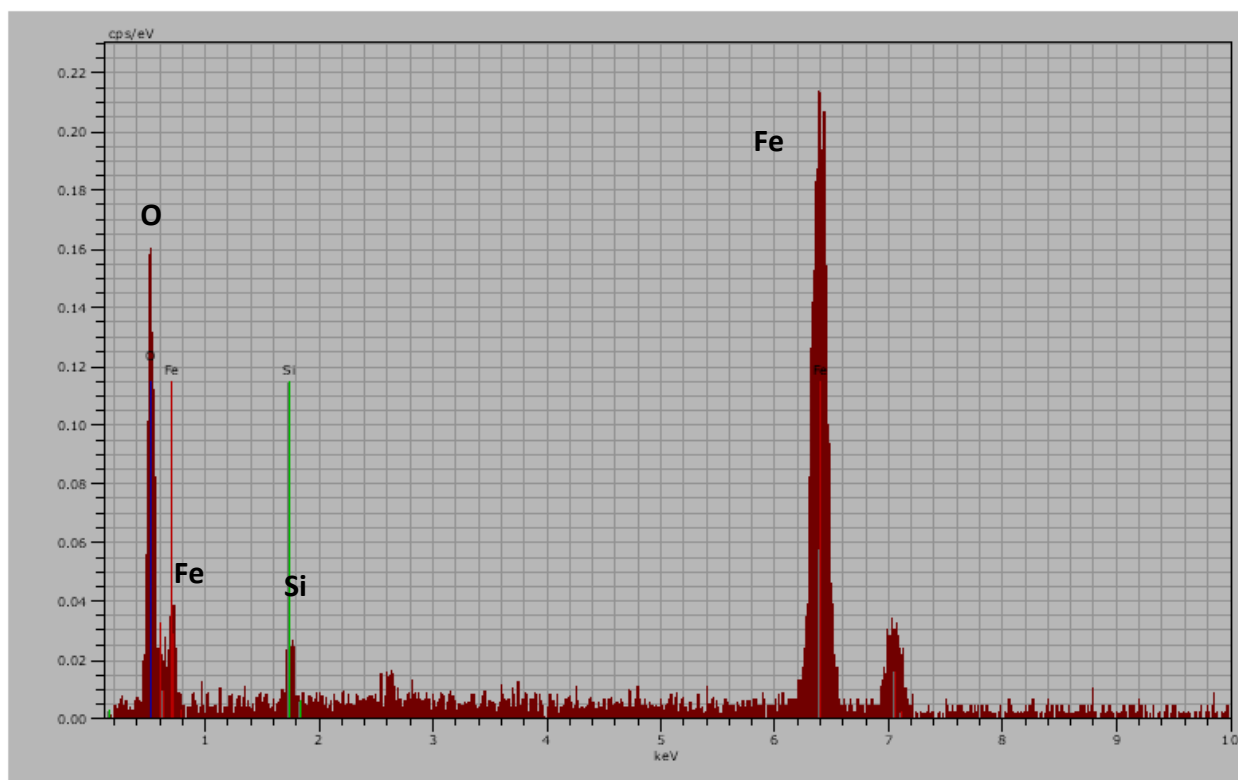

Supplementary information S1: EDAX analysis of magnetite –silica nanocomposite

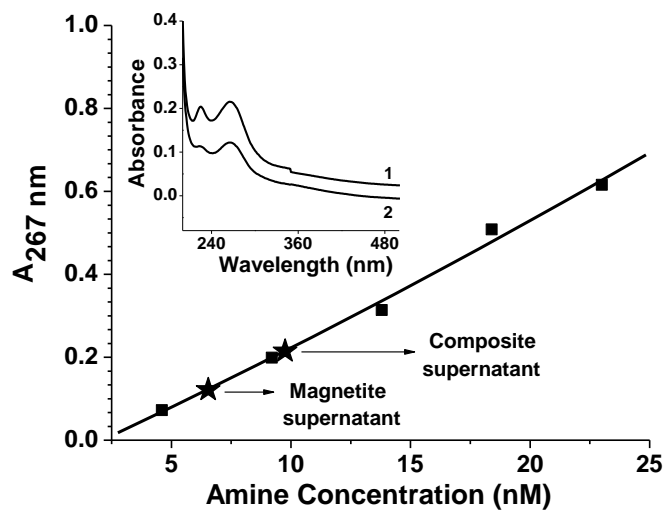

Supplementary information figure S2: Amine quantification standard curve. Inset shows the curves for composite (curve 1) and magnetite (curve 2).

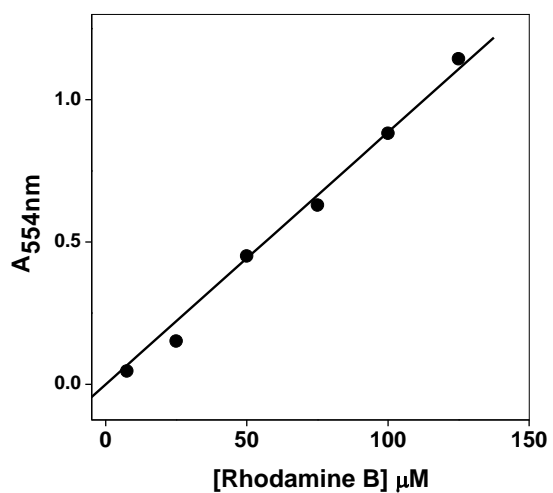

Supplementary information figure S3: Rhodamine B standard curve recorded as a function of dye concentration and measuring the absorbance at 540 nm.

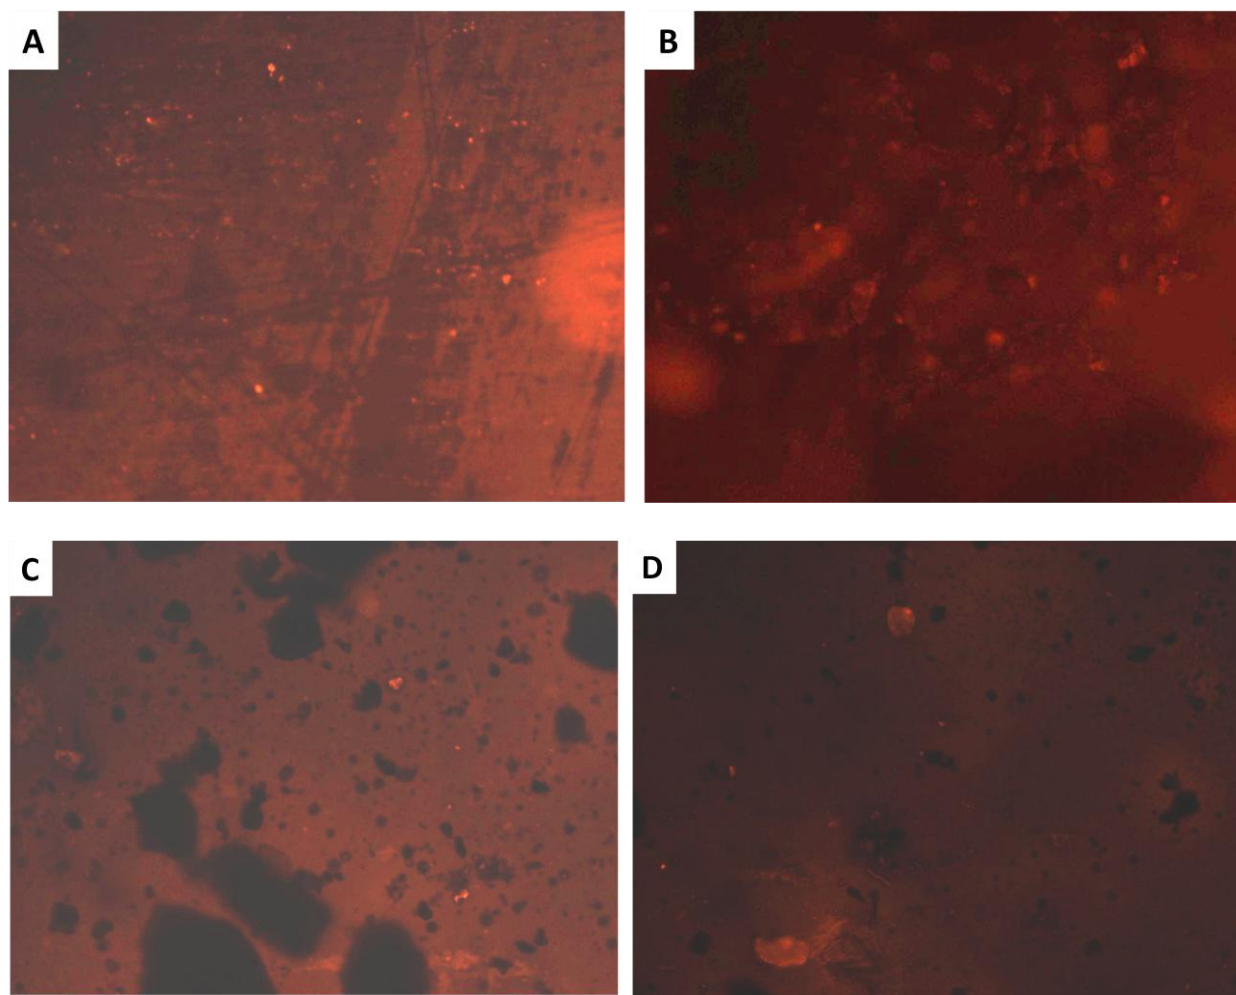

Supplementary information figure S4: Fluorescence images of Rhodamine B tagged particles: A & B: Rhodamine B tagged magnetite-silica composite; C&D: Rhodamine B tagged bare magnetite particles.
